# Supplementary material for: Fluffy mesoporous Al2O3 supported Ag–In2O3 schottky junction catalysts for selective hydrogenation of CO of α,β-unsaturated aldehydes
Source: Royal Society of Chemistry journal article supplement (doi:10.1039/d4nr05518g), 2025-01-01
Supplement: d4nr05518g1.pdf [file d4nr05518g1.pdf]

## **Supporting Information for “Fluffy mesoporous Al<sub>2</sub>O<sub>3</sub> supported Ag–In<sub>2</sub>O<sub>3</sub> schottky junction catalysts for selective hydrogenation of C=O of $\alpha,\beta$ -unsaturated aldehydes”**

Jiasheng Wang,<sup>\*a,b</sup> Tianyu Zhang,<sup>a,b</sup> Jiliang Song,<sup>a,b</sup> Fengxin Zhang,<sup>a,b</sup> Hong Liu,<sup>a,b</sup> Wan-Hui Wang<sup>a,b</sup> and Ming Bao<sup>\*a,b</sup>

<sup>a</sup> *State Key Laboratory of Fine Chemicals, Dalian University of Technology, Dalian, 116024, China.*

*E-mail: jswang@dlut.edu.cn; mingbao@dlut.edu.cn*

<sup>b</sup> *School of Chemical Engineering, Ocean and Life Sciences, Dalian University of Technology, Panjin, 124221, China.*

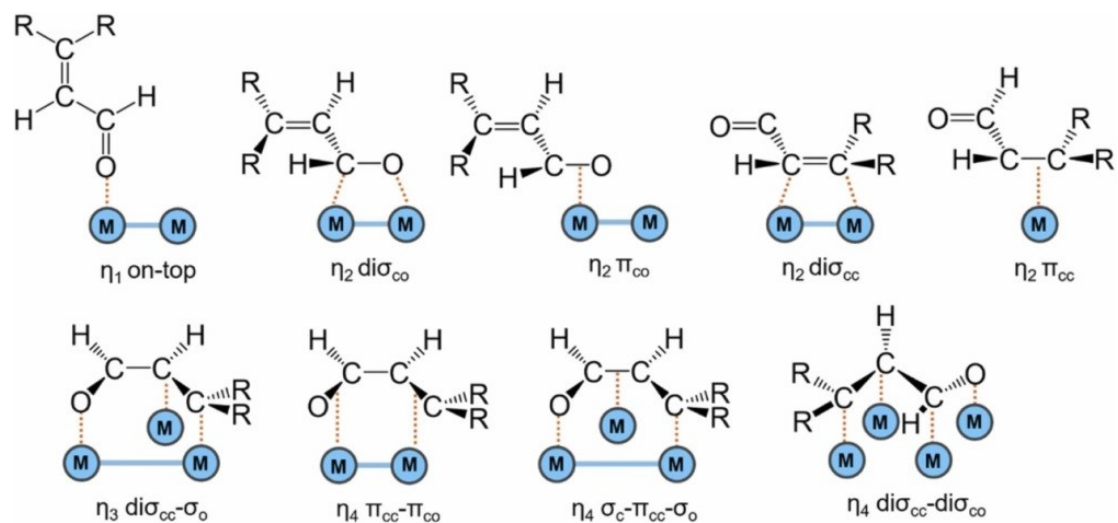

**Fig. S1** Adsorption patterns of UAL on metal species. Adapted with permission from Applied Catalysis A: General, 2023, 666, 119423. Copyright 2023 Elsevier.

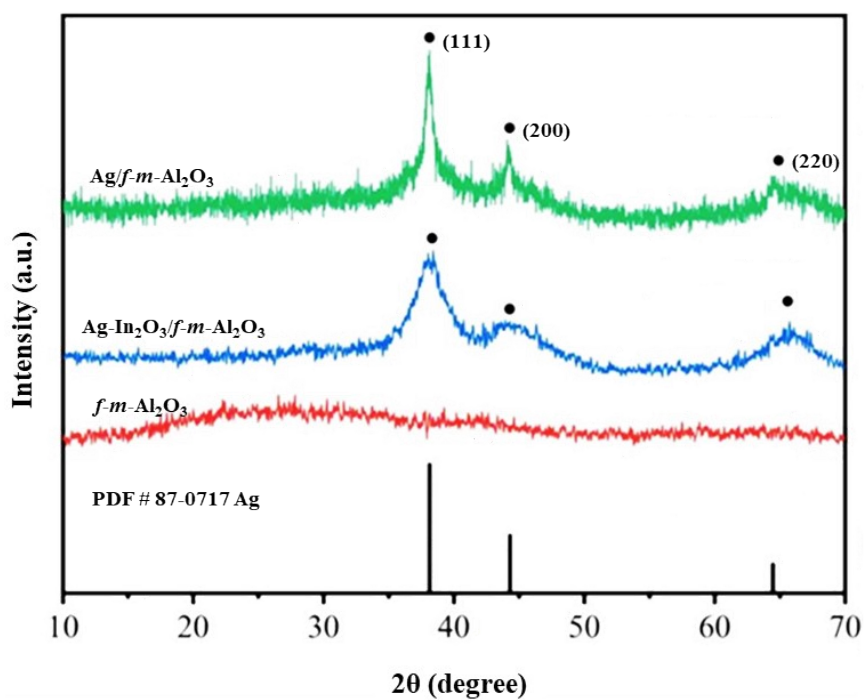

**Fig. S2** XRD patterns of  $Ag/f-m-Al_2O_3$ ,  $Ag-In_2O_3/f-m-Al_2O_3$  and  $f-m-Al_2O_3$ .

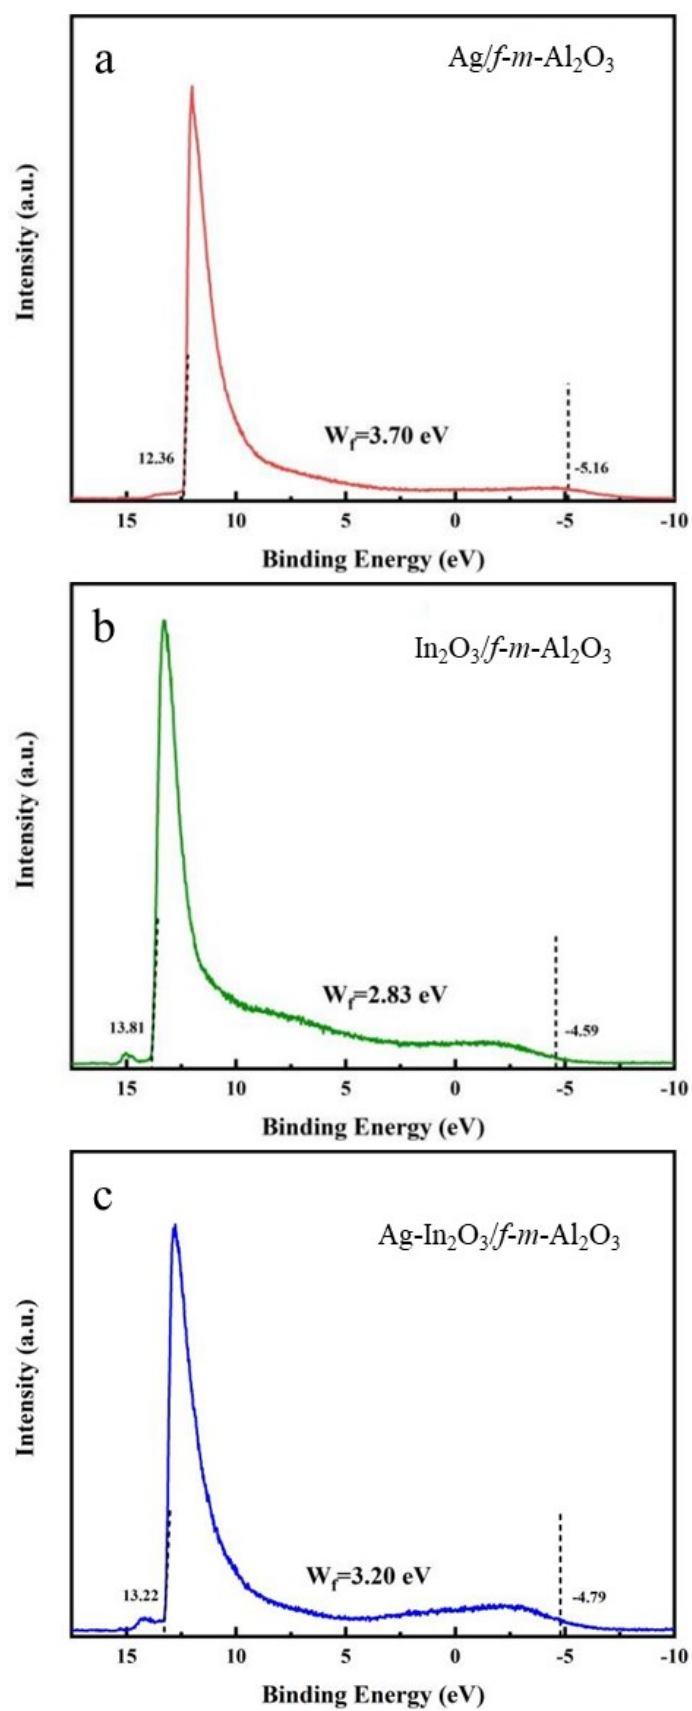

Fig. S3 The UPS spectra of (a) Ag/*f-m*-Al<sub>2</sub>O<sub>3</sub>, (b) In<sub>2</sub>O<sub>3</sub>/*f-m*-Al<sub>2</sub>O<sub>3</sub> and (c) Ag-In<sub>2</sub>O<sub>3</sub>/*f-m*-Al<sub>2</sub>O<sub>3</sub>.

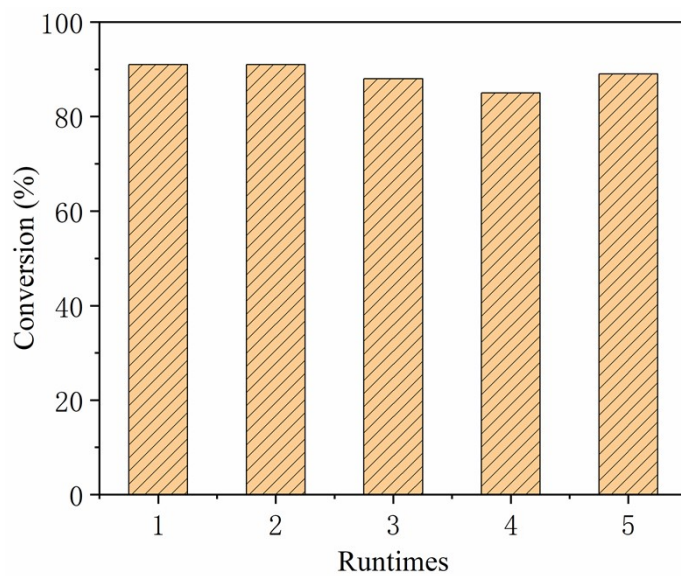

**Fig. S4** Repeatability of cinnamaldehyde hydrogenation over Ag-In<sub>2</sub>O<sub>3</sub>/*f-m*-Al<sub>2</sub>O<sub>3</sub>.

**Table S1** Specific surface area, pore volume and element content of the catalysts.

| Catalyst                                                                       | S <sub>BET</sub> (m <sup>2</sup> g <sup>-1</sup> ) <sup>a</sup> | V (cm <sup>3</sup> g <sup>-1</sup> ) | Elemental content (wt%) <sup>b</sup> |      |
|--------------------------------------------------------------------------------|-----------------------------------------------------------------|--------------------------------------|--------------------------------------|------|
|                                                                                |                                                                 |                                      | Ag                                   | In   |
| Ag-In <sub>2</sub> O <sub>3</sub> / <i>f-m</i> -Al <sub>2</sub> O <sub>3</sub> | 270.34                                                          | 0.76                                 | 8.76                                 | 0.88 |
| Ag-In <sub>2</sub> O <sub>3</sub> / <i>γ</i> -Al <sub>2</sub> O <sub>3</sub>   | 25.13                                                           | 0.15                                 | 9.02                                 | 0.90 |

<sup>a</sup> The BET specific surface area and pore volume were calculated by single point (P/P<sub>0</sub>=0.2).

<sup>b</sup> The elemental contents were calculated by ICP-MS.
